# Supplementary material for: Testing the Applicability of the Safe-by-Design Concept: A Theoretical Case Study Using Polymer Nanoclay Composites for Coffee Capsules
Source: MDPI journal article supplement (doi:10.3390/su132413951), 2021-12-17
Supplement: s1 [file s1]

Archive with 1 entries (1 files):
- sustainability-1464689-supplementary.pdf
